# Supplementary material
Source: PubMed Central journal article supplement (PMC10394220)
Supplement: jmcp.2023.22283_s001.pdf [file jmcp.2023.22283_s001.pdf]

## **SUPPLEMENTARY MATERIALS**

### **Potential cost savings in the United States from a reduction in sensor-detected severe hypoglycemia among users of the InPen smart insulin pen system**

Albert Chien, MA, MPH; Sneha Thanasekaran, MS; Angela Gaetano, MS; Glen Im, MS; Kael Wherry, PhD; Janice MacLeod, MA, RD, CDCES, FADCES; Robert A Vigersky, MD

**SUPPLEMENTARY TABLE 1** Description of sensor-detected severe hypoglycemic events

**SUPPLEMENTARY TABLE 2** Distribution of sensor-detected severe hypoglycemic events per day

**SUPPLEMENTARY TABLE 3** Pre-SIP to post-SIP classification of the LBGI-derived risk of severe hypoglycemia

**SUPPLEMENTARY TABLE 4** Cost calculation inputs and results

**Supplementary Table 1.** Description of Sensor-detected Severe Hypoglycemic Events

| <b>Metrics</b>                                                        | <b>Pre-SIP<br/>(N = 1,681)</b> | <b>Post-SIP<br/>(N = 1,681)</b> |
|-----------------------------------------------------------------------|--------------------------------|---------------------------------|
| Maximum number of sensor-detected severe hypoglycemic events in a day | 6                              | 6                               |
| Maximum number of sensor-detected severe hypoglycemic events per user | 36                             | 28                              |
| Average number of sensor-detected severe hypoglycemic events per day  | 0.10 ± 0.38                    | 0.08 ± 0.34                     |
| Average number of sensor-detected severe hypoglycemic events per user | 1.34 ± 3.00                    | 1.16 ± 2.54                     |

**Supplementary Table 2.** Distribution of Sensor-detected Severe Hypoglycemic Events per Day

| <b>Count of sensor-detected<br/>severe hypoglycemic events<br/>per day</b> | <b>Pre-SIP<br/>(N = 1,681)</b> | <b>Post-SIP<br/>(N = 1,681)</b> |
|----------------------------------------------------------------------------|--------------------------------|---------------------------------|
| 0                                                                          | 21,785                         | 21,968                          |
| 1                                                                          | 1,384                          | 1,259                           |
| 2                                                                          | 279                            | 241                             |
| 3                                                                          | 50                             | 53                              |
| 4                                                                          | 25                             | 10                              |
| 5                                                                          | 8                              | 2                               |
| 6                                                                          | 3                              | 1                               |

**Supplementary Table 3.** Pre-SIP to Post-SIP Classification of the LBGI-derived Risk of Severe Hypoglycemia

| <b>SH risk categories*:</b> | <b>Count (N = 1,681)</b> |
|-----------------------------|--------------------------|
| High to High                | 4                        |
| High to Moderate            | 4                        |
| Low to Low                  | 1,558                    |
| Low to Moderate             | 38                       |
| Moderate to High            | 2                        |
| Moderate to Low             | 38                       |
| Moderate to Moderate        | 38                       |

\*Low-risk (LBGI <2.5), moderate-risk (LBGI between 2.5 and 5), high-risk (LBGI >5) from Pre-SIP to Post-SIP period.

**Supplementary Table 4.** Cost Calculation Inputs and Results

| Parameter                                                                        | Pre-SIP (N = 1,681)                               |           | Post-SIP (N = 1,681)                              |           | Difference |
|----------------------------------------------------------------------------------|---------------------------------------------------|-----------|---------------------------------------------------|-----------|------------|
|                                                                                  | Calculation                                       | Result    | Calculation                                       | Result    |            |
| Number of severe hypoglycemic events per week*                                   | $(2,250 \times 25\%)/2$                           | 281       | $(1956 \times 25\%)/2$                            | 245       | -13%       |
| Expected number of severe hypoglycemia-related hospitalization per week          | $281 \times 6.7\%$                                | 19        | $245 \times 6.7\%$                                | 16        | -3         |
| Expected number of severe hypoglycemia-related emergency room visit per week     | $281 \times 14.5\%$                               | 41        | $245 \times 14.5\%$                               | 36        | -5         |
| Expected number of severe hypoglycemia-related ambulance transportation per week | $281 \times 29.3\%$                               | 82        | $245 \times 29.3\%$                               | 72        | -10        |
| Proportion of users with a severe hypoglycemia event                             | $661/1,681$                                       | 39.3%     | $626/1,681$                                       | 37.2%     | -2.1%      |
| Hospitalization cost per month for severe hypoglycemic events                    | $19 \times (52/12) \times \$16,160 \times 39.3\%$ | \$518,128 | $16 \times (52/12) \times \$16,160 \times 39.3\%$ | \$451,749 | -\$66,379  |
| Emergency room visit cost per month for severe hypoglycemic events               | $41 \times (52/12) \times \$2,100 \times 39.3\%$  | \$138,847 | $36 \times (52/12) \times \$2,100 \times 39.3\%$  | \$121,059 | -\$17,788  |
| Ambulance cost per month for severe hypoglycemic events                          | $82 \times (52/12) \times \$821 \times 39.3\%$    | \$115,115 | $72 \times (52/12) \times \$821 \times 39.3\%$    | \$100,367 | -\$14,748  |
| Total intervention cost per month                                                | $\$518,128 + \$138,847 + \$115,115$               | \$772,090 | $\$451,749 + \$121,059 + \$100,367$               | \$673,174 | -\$98,915  |
| Cost per SIP user per month                                                      | $\$772,090/1,681$                                 | \$459     | $\$673,174/1,681$                                 | \$400     | -\$59      |

\*Assuming 25% of sensor detected severe hypoglycemic events result in a clinical event.
